# Supplementary figures and images for: RNA-Seq of Cyst Nematode Infestation of Potato (Solanum tuberosum L.): A Comparative Transcriptome Analysis of Resistant and Susceptible Cultivars
Source: MDPI journal article supplement (doi:10.3390/plants11081008), 2022-04-07

## Supplementary Data and Figures

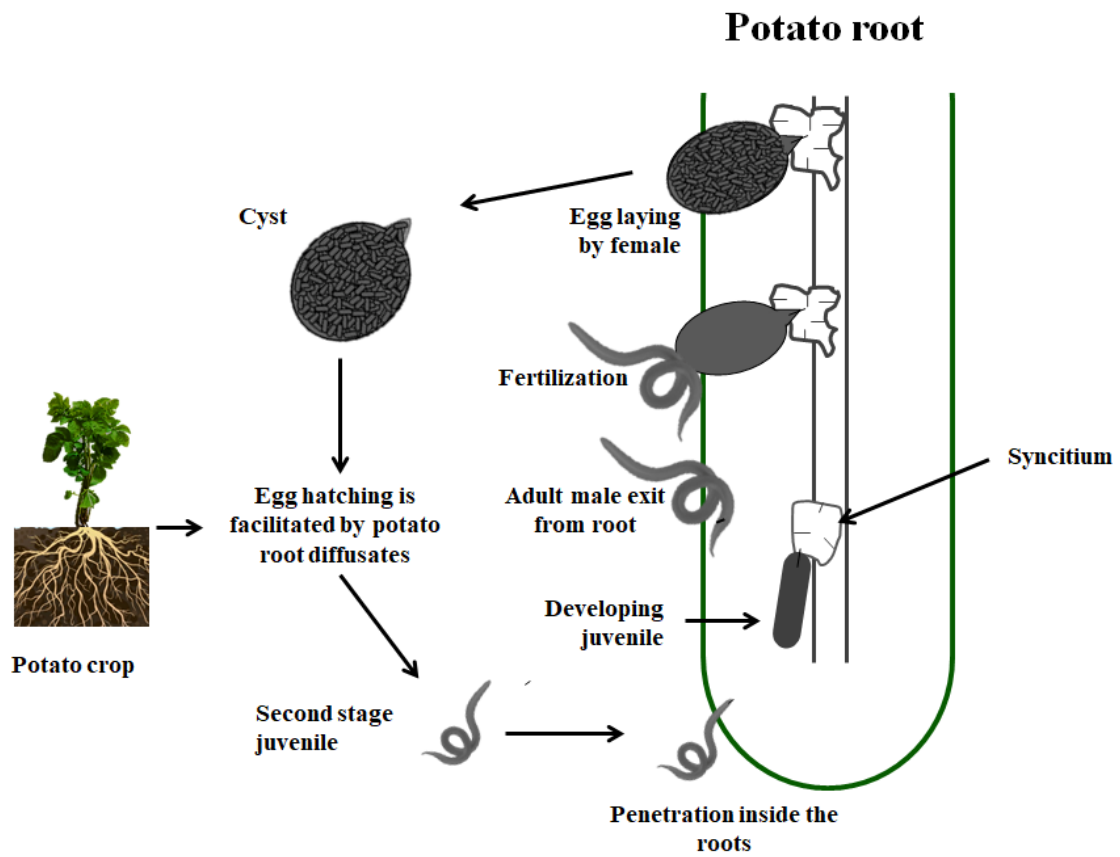

**Figure S1.** Life cycle of potato cyst nematode.

Supplement: s1 [file s1]
